# Supplementary material for: Hemoglobin A1c Reduction With the GLP-1 Receptor Agonist Semaglutide Is Independent of Baseline eGFR: post hoc Analysis of the SUSTAIN and PIONEER Programs
Source: PubMed Central journal article supplement (PMC9751689; doi:10.1016/j.ekir.2022.07.167), 2022-08-03
Supplement: mmc1.pdf [file mmc1.pdf]

## SUPPLEMENTARY MATERIAL

**Table S1.** Trial designs

|                  | <b>SUSTAIN 4</b>                                                                                  | <b>SUSTAIN 5</b>                                     | <b>SUSTAIN 6</b>                                        | <b>SUSTAIN 10</b>                                                 | <b>PIONEER 5</b>                              | <b>PIONEER 6</b>                           |
|------------------|---------------------------------------------------------------------------------------------------|------------------------------------------------------|---------------------------------------------------------|-------------------------------------------------------------------|-----------------------------------------------|--------------------------------------------|
| Study drug       | OW s.c.<br>semaglutide 0.5 mg<br>/ 1.0 mg vs<br>s.c. OD insulin<br>glargine starting<br>from 10 U | OW s.c.<br>semaglutide 0.5 mg<br>/ 1.0 mg vs placebo | OW s.c.<br>semaglutide 0.5 mg<br>/ 1.0 mg vs placebo    | OW s.c.<br>semaglutide 1.0 mg<br>vs s.c. OD<br>liraglutide 1.2 mg | OD oral<br>semaglutide 14 mg<br>vs placebo    | OD oral<br>semaglutide 14 mg<br>vs placebo |
| Trial design     | Open-label RCT                                                                                    | Double-blind RCT                                     | Double-blind<br>placebo-controlled<br>CVOT              | Open-label RCT                                                    | Double-blind RCT                              | Double-blind<br>placebo-controlled<br>CVOT |
| Trial duration   | 30 weeks                                                                                          | 30 weeks                                             | 104 weeks*                                              | 30 weeks                                                          | 26 weeks                                      | ≤83 weeks<br>(event-driven)*               |
| Previous therapy | OAD                                                                                               | Insulin                                              | Drug-naïve / OAD /<br>insulin                           | OAD                                                               | Insulin                                       | –                                          |
| GLAs             | Add-on: MET± SU                                                                                   | Add-on: basal<br>insulin ± MET                       | Add-on: with or<br>without basal or<br>premixed insulin | Add-on: MET, SU,<br>or an SGLT-2i,                                | Add-on: basal<br>insulin ± MET or<br>MET ± SU | Standard of care                           |

|                                                                        |     |     |                                                     |                         |            |     |
|------------------------------------------------------------------------|-----|-----|-----------------------------------------------------|-------------------------|------------|-----|
|                                                                        |     |     |                                                     | alone or in combination |            |     |
| Kidney function, eGFR (ml/min/1.73 m <sup>2</sup> ) exclusion criteria | <30 | <30 | Chronic hemodialysis or chronic peritoneal dialysis | <30                     | <30 or ≥60 | <30 |

\*Median trial duration for SUSTAIN 6 and PIONEER 6. CVOT, cardiovascular outcomes trial; eGFR, estimated glomerular filtration rate; GLA, glucose-lowering agent; MET, metformin; OAD, oral antidiabetes drug; OD, once-daily; OW, once-weekly; RCT, randomized controlled trial; s.c., subcutaneous; SGLT-2i, sodium–glucose co-transporter-2 inhibitor; SU, sulfonylurea.

**Table S2.** Demographics and baseline characteristics by trial and baseline eGFR in (A) SUSTAIN 4 and 5, (B) SUSTAIN 6 and 10, and (C) PIONEER 5 and 6\*

**A**

| Study                                      | SUSTAIN 4      |                | SUSTAIN 5        |                 |
|--------------------------------------------|----------------|----------------|------------------|-----------------|
|                                            | <60            | ≥60            | <60              | ≥60             |
| <b>Baseline eGFR (CKD-EPI)</b>             |                |                |                  |                 |
| <b>N (%)</b>                               | 43 (4.0)       | 1039 (96.0)    | 29 (7.3)         | 367 (92.7)      |
| Age, mean (SD), years                      | 64.3 (9.8)     | 56.1 (10.3)    | 67.9 (7.5)       | 58.1 (9.9)      |
| Female, <i>n</i> (%)                       | 17 (39.5)      | 491 (47.3)     | 18 (62.1)        | 156 (42.5)      |
| HbA1c, mean (SD), %                        | 8.2 (1.0)      | 8.2 (0.9)      | 8.3 (0.9)        | 8.4 (0.8)       |
| Body weight, mean (SD), kg                 | 93.0 (20.5)    | 93.5 (21.9)    | 89.3 (17.7)      | 91.9 (21.2)     |
| Diabetes duration, years,<br>median (IQR)  | 7.5 (5.6–14.5) | 7.2 (4.0–11.1) | 16.1 (10.1–23.0) | 11.9 (7.0–17.0) |
| Metformin use at baseline, <i>n</i><br>(%) | 43 (100)       | 1039 (100)     | 22 (75.9)        | 308 (83.9)      |
| SBP, mmHg, mean (SD)                       | 131.8 (19.2)   | 132.1 (15.1)   | 139.4 (17.7)     | 134.4 (15.8)    |
| DBP, mmHg, mean (SD)                       | 77.0 (8.5)     | 80.0 (8.5)     | 80.2 (12.3)      | 78.9 (9.6)      |

|                                              |             |             |            |             |
|----------------------------------------------|-------------|-------------|------------|-------------|
| UACR, mg/g, geometric mean<br>(% covariance) | 30.4 (1176) | 14.3 (239)  | 52.2 (765) | 21.5 (341)  |
| eGFR (CKD-EPI), mean (SD)                    | 52.7 (6.5)  | 97.9 (15.7) | 50.6 (7.6) | 93.4 (15.3) |
| Kidney impairment, <i>n</i> (%)              |             |             |            |             |
| None (eGFR ≥90)                              | 0 (0.0)     | 751 (72.3)  | 0 (0.0)    | 229 (62.4)  |
| Mild (eGFR ≥60 to <90)                       | 0 (0.0)     | 288 (27.7)  | 0 (0.0)    | 138 (37.6)  |
| Moderate (eGFR ≥30 to <60)                   | 43 (100)    | 0 (0.0)     | 29 (100)   | 0 (0.0)     |
| Severe (eGFR ≥15 to <30)                     | 0 (0.0)     | 0 (0.0)     | 0 (0.0)    | 0 (0.0)     |

**B**

| Study                                        | SUSTAIN 6        |                 |                 | SUSTAIN 10      |                |
|----------------------------------------------|------------------|-----------------|-----------------|-----------------|----------------|
|                                              | <45              | 45–60           | ≥60             | <60             | ≥60            |
| <b>Baseline eGFR (CKD-EPI)</b>               |                  |                 |                 |                 |                |
| <b>N (%)</b>                                 | 399 (12.2)       | 444 (13.6)      | 2427 (74.2)     | 29 (5.0)        | 548 (95.0)     |
| Age, mean (SD), years                        | 67.6 (8.1)       | 67.8 (7.4)      | 63.6 (6.9)      | 70.4 (6.2)      | 59.0 (10.1)    |
| Female, <i>n</i> (%)                         | 184 (46.1)       | 177 (39.9)      | 925 (38.1)      | 16 (55.2)       | 234 (42.7)     |
| HbA1c, mean (SD), %                          | 8.6 (1.4)        | 8.6 (1.4)       | 8.7 (1.5)       | 8.1 (0.9)       | 8.2 (1.0)      |
| Body weight, mean (SD), kg                   | 90.3 (21.9)      | 94.3 (22.2)     | 92.0 (20.0)     | 88.1 (21.6)     | 97.4 (21.2)    |
| Diabetes duration, years,<br>median (IQR)    | 16.3 (10.9–22.6) | 14.5 (9.6–20.4) | 12.1 (7.2–17.5) | 13.4 (9.4–17.5) | 8.1 (4.6–12.1) |
| Metformin use at baseline,<br><i>n</i> (%)   | 117 (29.3)       | 267 (60.1)      | 2014 (83.0)     | 24 (82.8)       | 523 (95.4)     |
| SBP, mmHg, mean (SD)                         | 138.7 (20.8)     | 134.6 (17.0)    | 135.3 (16.4)    | 138.7 (14.7)    | 136.3 (14.8)   |
| DBP, mmHg, mean (SD)                         | 76.1 (11.1)      | 75.6 (10.7)     | 77.5 (9.6)      | 74.7 (9.7)      | 81.6 (9.3)     |
| UACR, mg/g, geometric mean<br>(% covariance) | 121.3 (1501)     | 34.6 (828.4)    | 17.4 (486.7)    | Not available   | Not available  |
| eGFR (CKD-EPI), mean (SD)                    | 34.1 (8.2)       | 52.6 (4.2)      | 86.8 (13.7)     | 49.4 (6.9)      | 94.6 (14.5)    |

|                                 |            |           |             |          |            |
|---------------------------------|------------|-----------|-------------|----------|------------|
| Kidney impairment, <i>n</i> (%) |            |           |             |          |            |
| None (eGFR ≥90)                 | 0 (0.0)    | 0 (0.0)   | 1119 (46.1) | 0 (0.0)  | 369 (67.3) |
| Mild (eGFR ≥60 to <90)          | 0 (0.0)    | 0 (0.0)   | 1308 (53.9) | 0 (0.0)  | 179 (32.7) |
| Moderate (eGFR ≥30 to <60)      | 289 (72.4) | 444 (100) | 0 (0.0)     | 29 (100) | 0 (0.0)    |
| Severe (eGFR ≥15 to <30)        | 100 (25.1) | 0 (0.0)   | 0 (0.0)     | 0 (0.0)  | 0 (0.0)    |

C

| Study                                      | PIONEER 5       |                 |                 | PIONEER 6        |                  |                 |
|--------------------------------------------|-----------------|-----------------|-----------------|------------------|------------------|-----------------|
|                                            | <45             | 45–60           | ≥60             | <45              | 45–60            | ≥60             |
| <b>Baseline eGFR (CKD-EPI)</b>             |                 |                 |                 |                  |                  |                 |
| <b>N (%)</b>                               | 122 (37.7)      | 171 (52.8)      | 31 (9.6)        | 333 (10.5)       | 523 (16.5)       | 2308 (72.9)     |
| Age, mean (SD), years                      | 70.6 (8.5)      | 70.8 (7.3)      | 66.6 (8.2)      | 70.3 (7.1)       | 68.6 (6.7)       | 65.0 (6.8)      |
| Female, <i>n</i> (%)                       | 67 (54.9)       | 88 (51.5)       | 13 (41.9)       | 125 (37.5)       | 180 (34.4)       | 695 (30.1)      |
| HbA1c, mean (SD), %                        | 8.0 (0.8)       | 8.0 (0.7)       | 7.9 (0.7)       | 8.0 (1.5)        | 8.1 (1.6)        | 8.2 (1.6)       |
| Body weight, mean (SD), kg                 | 90.5 (17.4)     | 90.4 (17.6)     | 94.4 (18.3)     | 92.2 (21.2)      | 93.9 (21.6)      | 90.1 (21.1)     |
| Diabetes duration, years,<br>median (IQR)  | 14.2 (8.9–19.0) | 12.6 (7.6–16.2) | 12.6 (6.0–17.0) | 17.4 (12.2–23.2) | 15.3 (10.2–21.3) | 13.3 (8.1–18.5) |
| Metformin use at baseline,<br><i>n</i> (%) | 79 (64.8)       | 137 (80.1)      | 26 (83.9)       | 141 (42.3)       | 355 (67.9)       | 1953 (84.6)     |
| SBP, mmHg, mean (SD)                       | 138.2 (16.4)    | 136.9 (14.7)    | 138.5 (12.4)    | 135.5 (17.5)     | 136.3 (18.2)     | 135.4 (17.5)    |
| DBP, mmHg, mean (SD)                       | 79.3 (9.3)      | 76.6 (9.2)      | 77.1 (6.9)      | 74.4 (10.2)      | 75.3 (10.0)      | 76.4 (10.0)     |
| eGFR (CKD-EPI), mean (SD)                  | 37.8 (4.8)      | 51.3 (3.9)      | 65.5 (5.8)      | 37.4 (5.8)       | 52.3 (4.4)       | 84.5 (13.6)     |
| Kidney impairment, <i>n</i> (%)            |                 |                 |                 |                  |                  |                 |
| None (eGFR ≥90)                            | 0 (0.0)         | 0 (0.0)         | 0 (0.0)         | 0 (0.0)          | 0 (0.0)          | 919 (39.8)      |

|                                     |            |           |          |            |           |             |
|-------------------------------------|------------|-----------|----------|------------|-----------|-------------|
| Mild (eGFR $\geq$ 60 to $<$ 90)     | 0 (0.0)    | 0 (0.0)   | 31 (100) | 0 (0.0)    | 0 (0.0)   | 1389 (60.2) |
| Moderate (eGFR $\geq$ 30 to $<$ 60) | 114 (93.4) | 171 (100) | 0 (0)    | 304 (91.3) | 523 (100) | 0 (0)       |
| Severe (eGFR $\geq$ 15 to $<$ 30)   | 8 (6.6)    | 0 (0)     | 0 (0)    | 28 (8.4)   | 0 (0)     | 0 (0)       |

Data are from the full analysis set.

CKD-EPI, Chronic Kidney Disease Epidemiology Collaboration; DBP, diastolic blood pressure; eGFR, estimated glomerular filtration rate (measured in ml/min/1.73 m<sup>2</sup>); HbA1c, haemoglobin A1c; SD, standard deviation; SBP, systolic blood pressure; SD, standard deviation; UACR, urinary albumin-creatinine ratio.

\*AEs are included for participants with  $\geq$ 1 event.



**Table S3.** Summary of adverse events in (A) SUSTAIN 6 and 10, and (B) PIONEER 5 and 6 by baseline eGFR <45, 45 to <60, and ≥60 ml/min/1.73 m<sup>2</sup>

**A**

| Study                              | SUSTAIN 6                |                      |                          |                      |                           |                       | SUSTAIN 10              |                         |                          |                          |
|------------------------------------|--------------------------|----------------------|--------------------------|----------------------|---------------------------|-----------------------|-------------------------|-------------------------|--------------------------|--------------------------|
|                                    | <45                      |                      | 45 to <60                |                      | ≥60                       |                       | <60                     |                         | ≥60                      |                          |
| Baseline eGFR<br>(CKD-EPI)         |                          |                      |                          |                      |                           |                       |                         |                         |                          |                          |
|                                    | Semaglutide<br>(n = 193) | Placebo<br>(n = 206) | Semaglutide<br>(n = 223) | Placebo<br>(n = 221) | Semaglutide<br>(n = 1215) | Placebo<br>(n = 1212) | Semaglutide<br>(n = 14) | Liraglutide<br>(n = 15) | Semaglutide<br>(n = 276) | Liraglutide<br>(n = 272) |
| AEs                                | 176 (91.2)               | 192 (93.2)           | 204 (91.5)               | 202 (91.4)           | 1076 (88.6)               | 1081 (89.2)           | 13 (92.9)               | 13 (86.7)               | 192 (69.6)               | 177 (65.1)               |
| Serious AEs                        | 80 (41.5)                | 97 (47.1)            | 102 (45.7)               | 97 (43.9)            | 378 (31.1)                | 429 (35.4)            | 0 (0)                   | 1 (6.7)                 | 18 (6.5)                 | 22 (8.1)                 |
| Severe AEs                         | 58 (30.1)                | 79 (38.3)            | 80 (35.9)                | 69 (31.2)            | 265 (21.8)                | 258 (21.3)            | 2 (14.3)                | 2 (13.3)                | 16 (5.8)                 | 15 (5.5)                 |
| Fatal AEs                          | 10 (5.2)                 | 12 (5.8)             | 13 (5.8)                 | 10 (4.5)             | 39 (3.2)                  | 38 (3.1)              | 0 (0)                   | 0 (0)                   | 0 (0)                    | 0 (0)                    |
| GI AEs                             | 105 (54.4)               | 79 (38.3)            | 124 (55.6)               | 86 (38.9)            | 612 (50.4)                | 414 (34.2)            | 7 (50.0)                | 5 (33.3)                | 120 (43.5)               | 105 (38.6)               |
| Severe hypoglycemic episodes (ADA) | 6 (3.1)                  | 10 (4.9)             | 5 (2.2)                  | 8 (3.6)              | 14 (1.2)                  | 11 (0.9)              | 0 (0)                   | 0 (0)                   | 0 (0)                    | 0 (0)                    |
| Acute kidney failure               | 13 (6.7)                 | 26 (12.6)            | 26 (11.7)                | 13 (5.9)             | 25 (2.1)                  | 28 (2.3)              | 0 (0)                   | 1 (6.7)                 | 0 (0)                    | 0 (0)                    |

|                                                            |           |           |           |          |            |          |          |         |           |          |
|------------------------------------------------------------|-----------|-----------|-----------|----------|------------|----------|----------|---------|-----------|----------|
| AE leading to<br>premature<br>treatment<br>discontinuation | 33 (17.1) | 23 (11.2) | 38 (17.0) | 14 (6.3) | 143 (11.8) | 73 (6.0) | 4 (28.6) | 1 (6.7) | 29 (10.5) | 19 (7.0) |
|------------------------------------------------------------|-----------|-----------|-----------|----------|------------|----------|----------|---------|-----------|----------|

**B**

| Study                              | PIONEER 5             |                  |                       |                  |                       |                  | PIONEER 6              |                   |                        |                   |                         |                    |
|------------------------------------|-----------------------|------------------|-----------------------|------------------|-----------------------|------------------|------------------------|-------------------|------------------------|-------------------|-------------------------|--------------------|
|                                    | <45                   |                  | 45 to <60             |                  | ≥60                   |                  | <45                    |                   | 45 to <60              |                   | ≥60                     |                    |
| Baseline eGFR (CKD-EPI)            | Sema-glutide (n = 65) | Placebo (n = 57) | Sema-glutide (n = 83) | Placebo (n = 88) | Sema-glutide (n = 15) | Placebo (n = 16) | Sema-glutide (n = 167) | Placebo (n = 166) | Sema-glutide (n = 267) | Placebo (n = 256) | Sema-glutide (n = 1150) | Placebo (n = 1158) |
| AEs                                | 45 (69.2)             | 42 (73.7)        | 68 (81.9)             | 56 (63.6)        | 9 (60.0)              | 11 (68.8)        | 79 (47.3)              | 65 (39.2)         | 123 (46.1)             | 93 (36.3)         | 453 (39.4)              | 370 (32.0)         |
| Serious AEs                        | 8 (12.3)              | 10 (17.5)        | 11 (13.3)             | 6 (6.8)          | 1 (6.7)               | 2 (12.5)         | 50 (29.9)              | 53 (31.9)         | 67 (25.1)              | 67 (26.2)         | 207 (18.0)              | 249 (21.5)         |
| Severe AEs                         | 3 (4.6)               | 7 (12.3)         | 6 (7.2)               | 6 (6.8)          | 1 (6.7)               | 2 (12.5)         | 33 (19.8)              | 37 (22.3)         | 48 (18.0)              | 49 (19.1)         | 147 (12.8)              | 130 (11.2)         |
| Fatal AEs                          | 0 (0)                 | 0 (0)            | 0 (0)                 | 1 (1.1)          | 1 (6.7)               | 1 (6.3)          | 8 (4.8)                | 12 (7.2)          | 4 (1.5)                | 11 (4.3)          | 13 (1.1)                | 23 (2.0)           |
| GI AEs                             | 25 (38.5)             | 9 (15.8)         | 44 (53.0)             | 15 (17.0)        | 5 (33.3)              | 4 (25.0)         | 36 (21.6)              | 10 (6.0)          | 45 (16.9)              | 11 (4.3)          | 186 (16.2)              | 52 (4.5)           |
| Severe hypoglycemic episodes (ADA) | 0 (0)                 | 0 (0)            | 0 (0)                 | 0 (0)            | 0 (0)                 | 0 (0)            | 2 (1.2)                | 2 (1.2)           | 11 (4.1)               | 1 (0.4)           | 13 (1.1)                | 13 (1.1)           |
| Acute kidney failure               | 1 (1.5)               | 2 (3.5)          | 3 (3.6)               | 1 (1.1)          | 0 (0)                 | 0 (0)            | 11 (6.6)               | 8 (4.8)           | 2 (0.7)                | 4 (1.6)           | 10 (0.9)                | 10 (0.9)           |

|                                                   |          |         |           |         |          |       |           |           |           |           |            |            |
|---------------------------------------------------|----------|---------|-----------|---------|----------|-------|-----------|-----------|-----------|-----------|------------|------------|
| AE leading to premature treatment discontinuation | 8 (12.3) | 4 (7.0) | 14 (16.9) | 4 (4.5) | 2 (13.3) | 0 (0) | 57 (34.1) | 37 (22.3) | 82 (30.7) | 52 (20.3) | 285 (24.8) | 178 (15.4) |
|---------------------------------------------------|----------|---------|-----------|---------|----------|-------|-----------|-----------|-----------|-----------|------------|------------|

Data are *n* (%) and are from the full analysis set.

ADA, American Diabetes Association; AE, adverse event; CKD-EPI, Chronic Kidney Disease Epidemiology Collaboration; eGFR, estimated glomerular filtration rate (measured in ml/min/1.73 m<sup>2</sup>); GI, gastrointestinal.

**Figure S1.** Mean change in HbA<sub>1c</sub> to end of treatment according to baseline eGFR\* (truncated between 5th and 95th percentile) in SUSTAIN 4–6 and 10, and PIONEER 5 and 6.

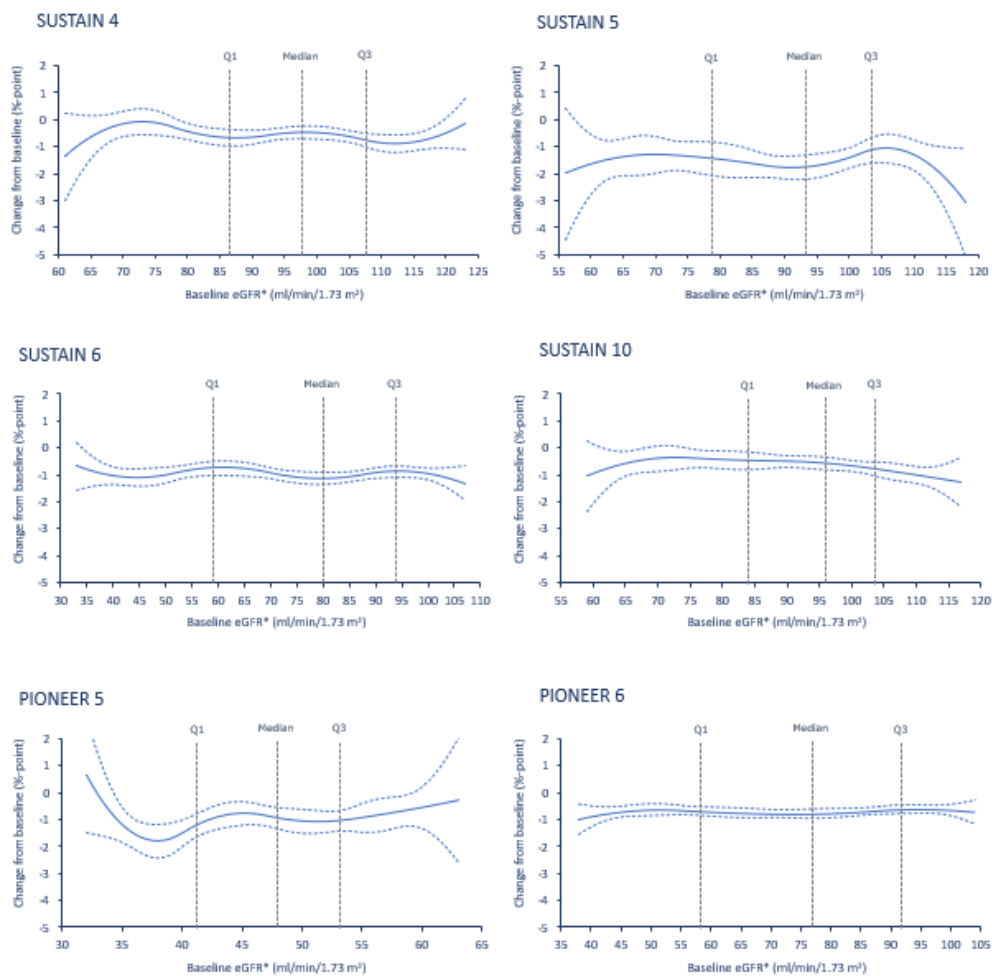

\*According to the Chronic Kidney Disease Epidemiology Collaboration equation.

Data are from the full analysis set. Data from participants who were on randomized treatment and without rescue medication or prematurely discontinued were included in the analyses, except for SUSTAIN 6 and PIONEER 6, for which all in-trial data for randomized participants were included. The treatment difference with baseline eGFR as a continuous variable was predicted using a mixed model with repeated measures quadratic spline function. Data are truncated between 5th and 95th percentile. Dashed lines represent 95% confidence intervals.

eGFR, estimated glomerular filtration rate.

**Figure S2.** Mean change in HbA<sub>1c</sub> to end of treatment by eGFR subgroups at baseline treatment group in SUSTAIN 4–6, 10 and PIONEER 5 and 6.

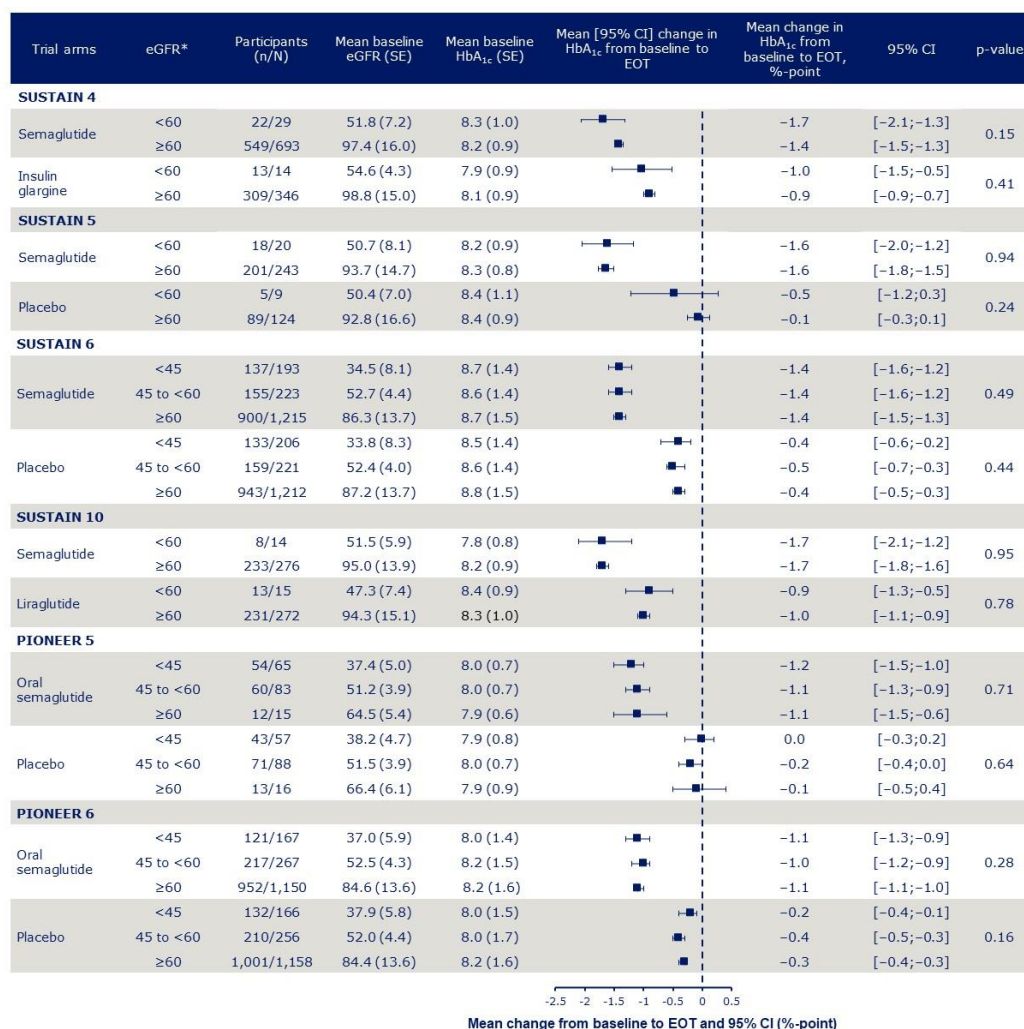

\*eGFR is measured in ml/min/1.73 m<sup>2</sup>.

Data are from the full analysis set. Data from participants who were on randomized treatment and without rescue medication or prematurely discontinued were included in the analyses, except for SUSTAIN 6 and PIONEER 6, for which all in-trial data for randomized participants were included. CI, confidence interval; eGFR, estimated glomerular filtration rate; EOT, end of treatment; N, number of participants in the full analysis set who received

semaglutide; n, number of participants who received semaglutide and contributed to the analysis; SE, standard error.
